# Supplementary material
Source: PubMed Central journal article supplement (PMC9631224)
Supplement: jamacardiol-e223844-s001.pdf [file jamacardiol-e223844-s001.pdf]

## Supplementary Online Content

O'Brien EC, Mulder H, Jones WS, et al. Concordance between patient-reported health data and electronic health data in the ADAPTABLE trial. *JAMA Cardiol*. Published online November 2, 2022. doi:10.1001/jamacardio.2022.3844

**eFigure 1.** Inclusion Criteria for the ADAPTABLE Trial

**eTable 1.** Observed Concordance Between Patient-Reported and EHR-Derived Demographic Characteristics

**eTable 2.** Observed Concordance Between Patient-Reported and EHR-Derived Follow-up Events

**eTable 3.** Baseline Characteristics by First MI Event Concordance Status

**eTable 4.** Baseline Characteristics by First Stroke Event Concordance Status

**eTable 5.** Baseline Characteristics by First Revascularization Event Concordance Status

**eTable 6.** Baseline Characteristics by First Bleeding Event Concordance Status

**eTable 7.** Effect Estimates When Using Various Data Sources for Trial End Points

**eFigure 2.** Participant Portal Engagement and Event Exclusions

This supplementary material has been provided by the authors to give readers additional information about their work.

**eFigure 1. Inclusion Criteria for the ADAPTABLE Trial**

|                                                                                                                                                                                                                                                                                                                                                                                                                                                                                                                                                                                                                                                                                                                                                                                                                                                                                                                                                                                                                                                                                                                                                                                                                                                                                                                                                                                                 |                                                                                                                                                                                                                                                                                                                                       |
|-------------------------------------------------------------------------------------------------------------------------------------------------------------------------------------------------------------------------------------------------------------------------------------------------------------------------------------------------------------------------------------------------------------------------------------------------------------------------------------------------------------------------------------------------------------------------------------------------------------------------------------------------------------------------------------------------------------------------------------------------------------------------------------------------------------------------------------------------------------------------------------------------------------------------------------------------------------------------------------------------------------------------------------------------------------------------------------------------------------------------------------------------------------------------------------------------------------------------------------------------------------------------------------------------------------------------------------------------------------------------------------------------|---------------------------------------------------------------------------------------------------------------------------------------------------------------------------------------------------------------------------------------------------------------------------------------------------------------------------------------|
| <ul style="list-style-type: none"> <li>• Known atherosclerotic cardiovascular disease (ASCVD), defined by:             <ul style="list-style-type: none"> <li>○ Prior myocardial infarction</li> <li>○ Prior coronary angiography showing <math>\geq 75\%</math> stenosis of at least one epicardial coronary vessel</li> <li>○ Prior coronary revascularization procedures (either PCI or CABG)</li> <li>○ History of chronic heart disease, CAD, ASCVD</li> </ul> </li> <li>• Age <math>\geq 18</math> years</li> <li>• Receiving care in a participating health system</li> <li>• No known safety concerns or side effects considered to be related to aspirin, including             <ul style="list-style-type: none"> <li>○ No history of significant allergy to aspirin</li> <li>○ No history of significant GI bleed within the past 12 months</li> <li>○ Significant bleeding disorders that preclude the use of aspirin</li> </ul> </li> <li>• Access to the Internet</li> <li>• Not treated with warfarin, dabigatran, rivaroxaban, apixaban, edoxaban (current or planned)</li> <li>• Not treated with ticagrelor (current or planned)</li> <li>• Not pregnant or nursing</li> <li>• Estimated risk of a major cardiovascular event (MACE) <math>&gt; 8\%</math> over next 3 years, defined as the presence of at least one or more of the following enrichment factors:</li> </ul> |                                                                                                                                                                                                                                                                                                                                       |
| <ul style="list-style-type: none"> <li>○ Age <math>&gt; 65</math> years</li> <li>○ Serum creatinine <math>&gt; 1.5</math> mg/dL</li> <li>○ Diabetes mellitus (Type 1 or Type 2)</li> <li>○ 3-vessel coronary artery disease</li> <li>○ Cerebrovascular disease and/or peripheral arterial disease</li> </ul>                                                                                                                                                                                                                                                                                                                                                                                                                                                                                                                                                                                                                                                                                                                                                                                                                                                                                                                                                                                                                                                                                    | <ul style="list-style-type: none"> <li>○ Left ventricular ejection fraction (LVEF) <math>&lt; 50\%</math></li> <li>○ Current cigarette smoker</li> <li>○ Chronic systolic or diastolic heart failure</li> <li>○ SBP <math>&gt; 140</math> in the past 12 months</li> <li>○ LDL <math>&gt; 130</math> in the past 12 months</li> </ul> |

**eTable 1.** Observed Concordance Between Patient-Reported and EHR-Derived Demographic Characteristics

| <b>Non-Hispanic White</b> |            |           |              | <b>Non-Hispanic Black</b> |            |           |              |
|---------------------------|------------|-----------|--------------|---------------------------|------------|-----------|--------------|
|                           | <b>EHR</b> |           |              |                           | <b>EHR</b> |           |              |
| <b>Participant Report</b> | <i>Yes</i> | <i>No</i> | <i>Total</i> | <b>Participant Report</b> | <i>Yes</i> | <i>No</i> | <i>Total</i> |
| <i>Yes</i>                | 10966      | 66        | 11032        | <i>Yes</i>                | 1198       | 24        | 1222         |
| <i>No</i>                 | 205        | 1784      | 1989         | <i>No</i>                 | 57         | 11742     | 11799        |
| <i>Total</i>              | 11171      | 1850      | 13021        | <i>Total</i>              | 1255       | 11766     | 13021        |
| <b>Non-Hispanic Other</b> |            |           |              | <b>Hispanic</b>           |            |           |              |
|                           | <b>EHR</b> |           |              |                           | <b>EHR</b> |           |              |
| <b>Participant Report</b> | <i>Yes</i> | <i>No</i> | <i>Total</i> | <b>Participant Report</b> | <i>Yes</i> | <i>No</i> | <i>Total</i> |
| <i>Yes</i>                | 165        | 185       | 350          | <i>Yes</i>                | 353        | 64        | 417          |
| <i>No</i>                 | 32         | 12639     | 12671        | <i>No</i>                 | 45         | 12559     | 12604        |
| <i>Total</i>              | 197        | 12824     | 13021        | <i>Total</i>              | 398        | 12623     | 13021        |
| <b>Current Smoker</b>     |            |           |              |                           |            |           |              |
|                           | <b>EHR</b> |           |              |                           | <b>EHR</b> |           |              |
| <b>Participant Report</b> | <i>Yes</i> | <i>No</i> | <i>Total</i> |                           |            |           |              |
| <i>Yes</i>                | 745        | 190       | 935          |                           |            |           |              |
| <i>No</i>                 | 278        | 8726      | 9004         |                           |            |           |              |
| <i>Total</i>              | 1023       | 8916      | 9939         |                           |            |           |              |

**eTable 2.** Observed Concordance Between Patient-Reported and EHR-Derived Follow-up Events

| <b>Coronary Revascularization</b> |            |           |              | <b>Stroke</b>         |            |           |              |
|-----------------------------------|------------|-----------|--------------|-----------------------|------------|-----------|--------------|
|                                   | <b>EHR</b> |           |              |                       | <b>EHR</b> |           |              |
| <b>Patient Report</b>             | <i>Yes</i> | <i>No</i> | <i>Total</i> | <b>Patient Report</b> | <i>Yes</i> | <i>No</i> | <i>Total</i> |
| <i>Yes</i>                        | 468        | 396       | 864          | <i>Yes</i>            | 52         | 82        | 134          |
| <i>No</i>                         | 331        | 13466     | 13797        | <i>No</i>             | 100        | 14427     | 14527        |
| <i>Total</i>                      | 799        | 13862     | 14661        | <i>Total</i>          | 152        | 14509     | 14661        |
|                                   |            |           |              |                       |            |           |              |
| <b>Myocardial Infarction</b>      |            |           |              | <b>Major Bleeding</b> |            |           |              |
|                                   | <b>EHR</b> |           |              |                       | <b>EHR</b> |           |              |
| <b>Patient Report</b>             | <i>Yes</i> | <i>No</i> | <i>Total</i> | <b>Patient Report</b> | <i>Yes</i> | <i>No</i> | <i>Total</i> |
| <i>Yes</i>                        | 114        | 166       | 280          | <i>Yes</i>            | 26         | 93        | 119          |
| <i>No</i>                         | 232        | 14149     | 14381        | <i>No</i>             | 45         | 14497     | 14542        |
| <i>Total</i>                      | 346        | 14315     | 14661        | <i>Total</i>          | 71         | 14590     | 14661        |

**eTable 3.** Baseline Characteristics by First MI Event Concordance Status

| <b>Characteristic</b>            | <b>Overall</b>     | <b>Concordant Events</b> | <b>Discordant Events</b> |
|----------------------------------|--------------------|--------------------------|--------------------------|
| Age (yrs)                        |                    |                          |                          |
| N                                | 14661              | 14263                    | 398                      |
| Mean (SD)                        | 66.7 (9.8)         | 66.7 (9.8)               | 66.5 (10.8)              |
| Median (Q1 - Q3)                 | 67.5 (60.7 - 73.5) | 67.5 (60.7 - 73.5)       | 66.7 (59.6 - 73.5)       |
| Min, Max                         | 20.8, 98.6         | 20.8, 98.6               | 32.2, 91.4               |
| Female                           | 4594 (31.3%)       | 4463 (31.3%)             | 131 (32.9%)              |
| Race                             |                    |                          |                          |
| White                            | 11711 (80.9%)      | 11417 (81.1%)            | 294 (74.1%)              |
| Black or African American        | 1295 (8.9%)        | 1236 (8.8%)              | 59 (14.9%)               |
| Asian                            | 144 (1.0%)         | 142 (1.0%)               | 2 (0.5%)                 |
| American Indian or Alaska native | 112 (0.8%)         | 107 (0.8%)               | 5 (1.3%)                 |
| Multiple                         | 130 (0.9%)         | 125 (0.9%)               | 5 (1.3%)                 |
| Other                            | 395 (2.7%)         | 381 (2.7%)               | 14 (3.5%)                |
| Opt out                          | 687 (4.7%)         | 669 (4.8%)               | 18 (4.5%)                |
| Ethnicity                        |                    |                          |                          |
| Hispanic                         | 472 (3.3%)         | 454 (3.2%)               | 18 (4.5%)                |
| Non-hispanic                     | 13253 (91.6%)      | 12892 (91.6%)            | 361 (90.9%)              |
| Opt out                          | 749 (5.2%)         | 731 (5.2%)               | 18 (4.5%)                |
| Current Smoker                   |                    |                          |                          |
| Missing                          | 884 (6.0%)         | 867 (6.1%)               | 17 (4.3%)                |
| No                               | 12421 (84.7%)      | 12096 (84.8%)            | 325 (81.7%)              |
| Yes                              | 1356 (9.2%)        | 1300 (9.1%)              | 56 (14.1%)               |

**eTable 4.** Baseline Characteristics by First Stroke Event Concordance Status

| <b>Characteristic</b>            | <b>Overall</b>     | <b>Concordant Events</b> | <b>Discordant Events</b> |
|----------------------------------|--------------------|--------------------------|--------------------------|
| Age (yrs)                        |                    |                          |                          |
| N                                | 14661              | 14479                    | 182                      |
| Mean (SD)                        | 66.7 (9.8)         | 66.7 (9.8)               | 68.0 (10.0)              |
| Median (Q1 - Q3)                 | 67.5 (60.7 - 73.5) | 67.5 (60.6 - 73.4)       | 68.1 (61.2 - 75.0)       |
| Min, Max                         | 20.8, 98.6         | 20.8, 97.3               | 40.6, 98.6               |
| Female                           | 4594 (31.3%)       | 4513 (31.2%)             | 81 (44.5%)               |
| Race                             |                    |                          |                          |
| White                            | 11711 (80.9%)      | 11578 (81.0%)            | 133 (73.5%)              |
| Black or African American        | 1295 (8.9%)        | 1266 (8.9%)              | 29 (16.0%)               |
| Asian                            | 144 (1.0%)         | 143 (1.0%)               | 1 (0.6%)                 |
| American Indian or Alaska native | 112 (0.8%)         | 111 (0.8%)               | 1 (0.6%)                 |
| Multiple                         | 130 (0.9%)         | 129 (0.9%)               | 1 (0.6%)                 |
| Other                            | 395 (2.7%)         | 385 (2.7%)               | 10 (5.5%)                |
| Opt out                          | 687 (4.7%)         | 681 (4.8%)               | 6 (3.3%)                 |
| Ethnicity                        |                    |                          |                          |
| Hispanic                         | 472 (3.3%)         | 465 (3.3%)               | 7 (3.9%)                 |
| Non-hispanic                     | 13253 (91.6%)      | 13086 (91.6%)            | 167 (92.3%)              |
| Opt out                          | 749 (5.2%)         | 742 (5.2%)               | 7 (3.9%)                 |
| Current Smoker                   |                    |                          |                          |
| Missing                          | 884 (6.0%)         | 876 (6.1%)               | 8 (4.4%)                 |
| No                               | 12421 (84.7%)      | 12265 (84.7%)            | 156 (85.7%)              |
| Yes                              | 1356 (9.2%)        | 1338 (9.2%)              | 18 (9.9%)                |

**eTable 5.** Baseline Characteristics by First Revascularization Event Concordance Status

| <b>Characteristic</b>            | <b>Overall</b>     | <b>Concordant Events</b> | <b>Discordant Events</b> |
|----------------------------------|--------------------|--------------------------|--------------------------|
| Age (yrs)                        |                    |                          |                          |
| N                                | 14661              | 13934                    | 727                      |
| Mean (SD)                        | 66.7 (9.8)         | 66.8 (9.8)               | 65.7 (9.8)               |
| Median (Q1 - Q3)                 | 67.5 (60.7 - 73.5) | 67.6 (60.7 - 73.5)       | 66.0 (59.5 - 72.7)       |
| Min, Max                         | 20.8, 98.6         | 20.8, 98.6               | 33.7, 91.0               |
| Female                           | 4594 (31.3%)       | 4380 (31.4%)             | 214 (29.4%)              |
| Race                             |                    |                          |                          |
| White                            | 11711 (80.9%)      | 11172 (81.3%)            | 539 (74.4%)              |
| Black or African American        | 1295 (8.9%)        | 1211 (8.8%)              | 84 (11.6%)               |
| Asian                            | 144 (1.0%)         | 138 (1.0%)               | 6 (0.8%)                 |
| American Indian or Alaska native | 112 (0.8%)         | 104 (0.8%)               | 8 (1.1%)                 |
| Multiple                         | 130 (0.9%)         | 118 (0.9%)               | 12 (1.7%)                |
| Other                            | 395 (2.7%)         | 374 (2.7%)               | 21 (2.9%)                |
| Opt out                          | 687 (4.7%)         | 633 (4.6%)               | 54 (7.5%)                |
| Ethnicity                        |                    |                          |                          |
| Hispanic                         | 472 (3.3%)         | 437 (3.2%)               | 35 (4.8%)                |
| Non-hispanic                     | 13253 (91.6%)      | 12613 (91.7%)            | 640 (88.4%)              |
| Opt out                          | 749 (5.2%)         | 700 (5.1%)               | 49 (6.8%)                |
| Current Smoker                   |                    |                          |                          |
| Missing                          | 884 (6.0%)         | 842 (6.0%)               | 42 (5.8%)                |
| No                               | 12421 (84.7%)      | 11836 (84.9%)            | 585 (80.5%)              |
| Yes                              | 1356 (9.2%)        | 1256 (9.0%)              | 100 (13.8%)              |

**eTable 6.** Baseline Characteristics by First Bleeding Event Concordance Status

| <b>Characteristic</b>            | <b>Overall</b>     | <b>Concordant Events</b> | <b>Discordant Events</b> |
|----------------------------------|--------------------|--------------------------|--------------------------|
| Age (yrs)                        |                    |                          |                          |
| N                                | 14661              | 14523                    | 138                      |
| Mean (SD)                        | 66.7 (9.8)         | 66.7 (9.8)               | 67.6 (10.4)              |
| Median (Q1 - Q3)                 | 67.5 (60.7 - 73.5) | 67.5 (60.6 - 73.5)       | 66.4 (60.9 - 74.3)       |
| Min, Max                         | 20.8, 98.6         | 20.8, 98.6               | 37.5, 97.3               |
| Female                           | 4594 (31.3%)       | 4544 (31.3%)             | 50 (36.2%)               |
| Race                             |                    |                          |                          |
| White                            | 11711 (80.9%)      | 11612 (81.0%)            | 99 (71.7%)               |
| Black or African American        | 1295 (8.9%)        | 1271 (8.9%)              | 24 (17.4%)               |
| Asian                            | 144 (1.0%)         | 143 (1.0%)               | 1 (0.7%)                 |
| American Indian or Alaska native | 112 (0.8%)         | 112 (0.8%)               | 0 (0.0%)                 |
| Multiple                         | 130 (0.9%)         | 128 (0.9%)               | 2 (1.4%)                 |
| Other                            | 395 (2.7%)         | 390 (2.7%)               | 5 (3.6%)                 |
| Opt out                          | 687 (4.7%)         | 680 (4.7%)               | 7 (5.1%)                 |
| Ethnicity                        |                    |                          |                          |
| Hispanic                         | 472 (3.3%)         | 466 (3.3%)               | 6 (4.3%)                 |
| Non-hispanic                     | 13253 (91.6%)      | 13132 (91.6%)            | 121 (87.7%)              |
| Opt out                          | 749 (5.2%)         | 738 (5.1%)               | 11 (8.0%)                |
| Current Smoker                   |                    |                          |                          |
| Missing                          | 884 (6.0%)         | 881 (6.1%)               | 3 (2.2%)                 |
| No                               | 12421 (84.7%)      | 12302 (84.7%)            | 119 (86.2%)              |
| Yes                              | 1356 (9.2%)        | 1340 (9.2%)              | 16 (11.6%)               |



**eTable 7. Effect Estimates When Using Various Data Sources for Trial End Points**

| <b>Data Source(s)</b>                                  | <b>81 mg</b>      | <b>325 mg</b>     | <b>Hazard Ratio<br/>(95% CI)<br/>81 vs 325</b> |
|--------------------------------------------------------|-------------------|-------------------|------------------------------------------------|
| EHR Only                                               |                   |                   | 0.98 (0.85 - 1.11)                             |
| N                                                      | 7,329             | 7,332             |                                                |
| Rate <sup>1</sup> (events)                             | 2.69 (430)        | 2.76 (433)        |                                                |
| Follow-up Time in Months [median (Q1, Q3)]             | 25.7 (18.1, 34.8) | 25.2 (17.5, 34.3) |                                                |
|                                                        |                   |                   |                                                |
| Portal Only                                            |                   |                   | 0.91 (0.80 - 1.04)                             |
| N                                                      | 7,540             | 7,536             |                                                |
| Rate <sup>1</sup> (events)                             | 3.20 (448)        | 3.48 (471)        |                                                |
| Follow-up Time in Months [median (Q1, Q3)]             | 21.9 (14.1, 31.1) | 21.2 (13.4, 30.5) |                                                |
|                                                        |                   |                   |                                                |
| EHR, Medicare, Private Claims, and Portal <sup>2</sup> |                   |                   | 1.02 (0.91 - 1.14)                             |
| N                                                      | 7,540             | 7,536             |                                                |
| Rate <sup>1</sup> (events)                             | 3.62 (590)        | 3.55 (569)        |                                                |
| Follow-up Time in Months [median (Q1, Q3)]             | 25.5 (17.8, 34.4) | 25.1 (17.5, 34.1) |                                                |
|                                                        |                   |                   |                                                |

Supplemental tables and figure

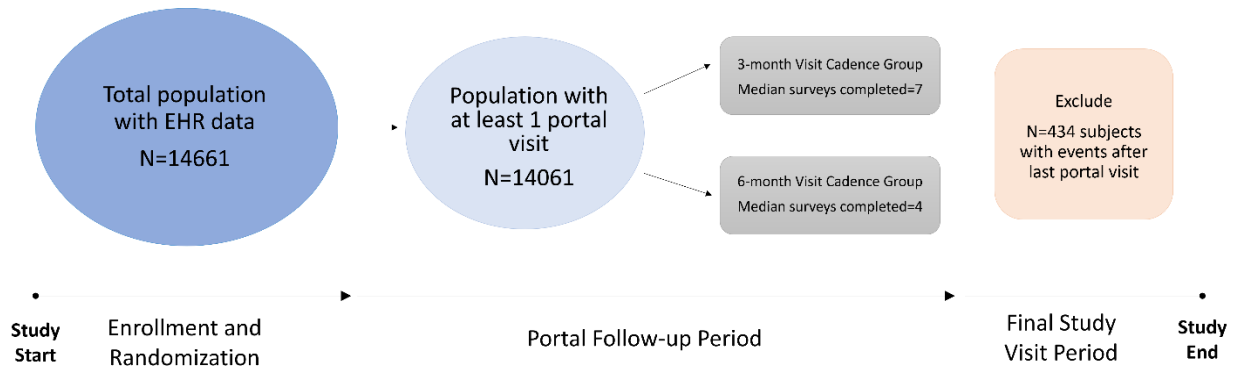

**eFigure 2.** Participant Portal Engagement and Event Exclusions
